# Supplementary material
Source: Research Square preprint supplement (doi:10.21203/rs.3.rs-8614681/v1)
Supplement: Supplementary file 1 [file d09f15590f68ea7ea9c1297c.docx]

| **Table 1: Ramsay Sedation Scale** | | |
| --- | --- | --- |
| Category | Score | Description |
| Awake | 1 | Patient is anxious, agitated, or restless. |
| 2 | Patient is cooperative, oriented, and tranquil. |
| 3 | Patient responds to commands only. |
| Asleep | 4 | Patient exhibits a brisk response to a light glabellar tap or loud auditory stimulus. |
| 5 | Patient exhibits a sluggish response to a light glabellar tap or loud auditory stimulus. |
| 6 | Patient exhibits no response to a light glabellar tap or loud auditory stimulus. |

| **Table 2: Anxiolysis Score** | |
| --- | --- |
| Score | Description |
| 1 | Apprehensive, restless, crying, and/or resists reassurance. |
| 2 | Fearful, moderate apprehension. |
| 3 | Mildly fearful, easily reassured by strangers, non-aggressive. |
| 4 | No signs of fear or anxiety. |
| 5 | Patient is asleep. |

| **Table 3: Cooperation Score** | |
| --- | --- |
| Score Description | |
| 1 | Vigorously resists the procedure. |
| 2 | Cooperation is achieved only with considerable effort by the staff. |
| 3 | Reluctantly accepts the procedure. |
| 4 | Readily accepts the procedure. |
| 5 | Patient is asleep. |

| **Table 4: Satisfaction Rating** | |
| --- | --- |
| Score Description | |
| 1 | Very Dissatisfied |
| 2 | Dissatisfied |
| 3 | Moderately Satisfied |
| 4 | Satisfied |
| 5 | Very Satisfied |
